# Supplementary material for: Synthesis, Crystal Structure, and Electrochemistry of Mono- and Bis-Homoannular Ferrocene Derivatives
Source: Preprints.org preprint supplement (doi:10.20944/preprints202401.0965.v2), 2024-01-29

**Supporting information.**

**Figure S1.** 1H NMR of **3a**


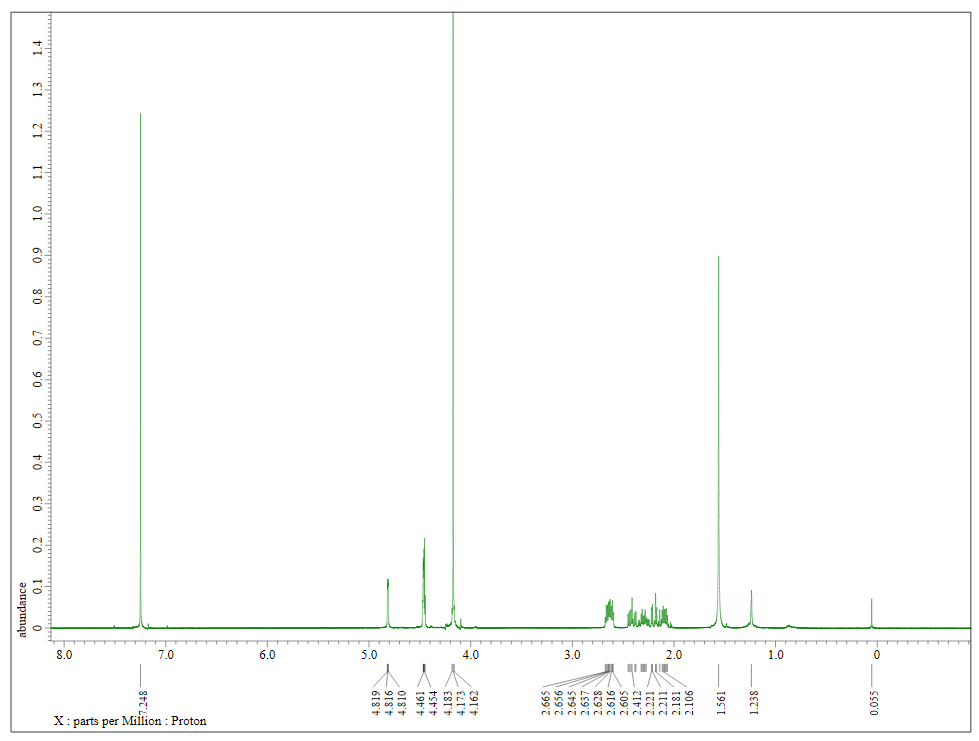


**Figure S2.** 13C NMR of **3a**


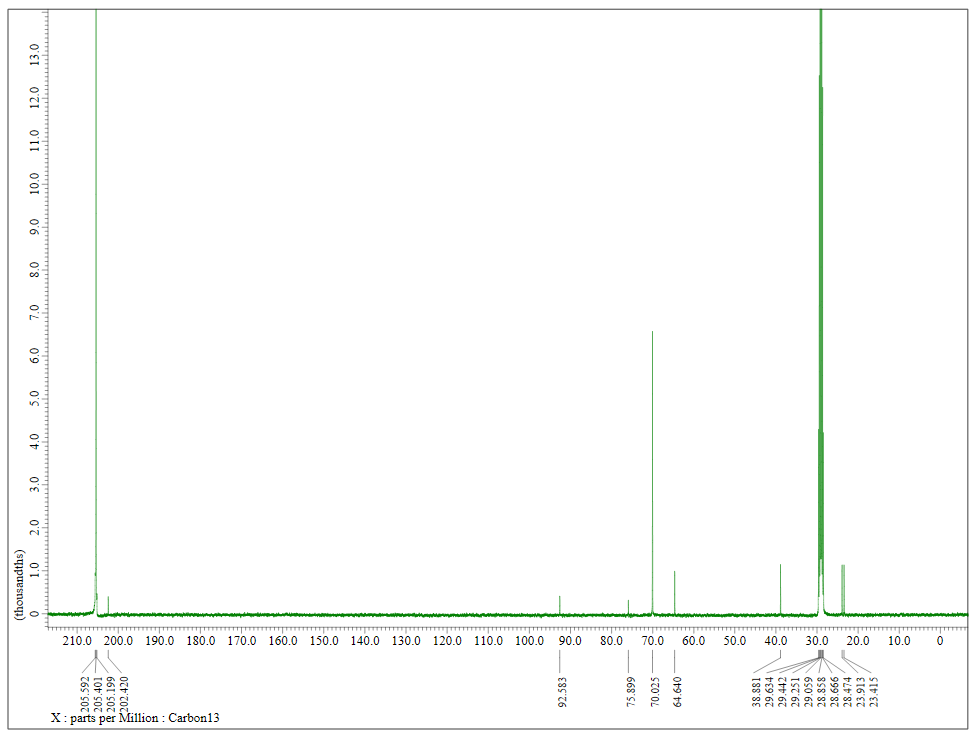


**Figure S3**. IR spectrum of **3a**

**
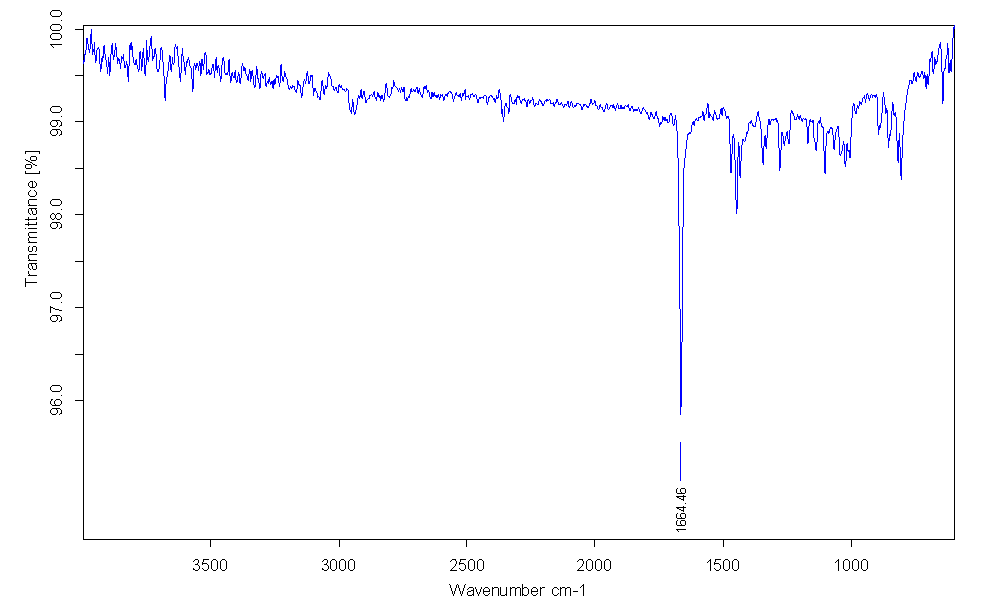
**

**Figure S4.** 1H NMR of **3b**


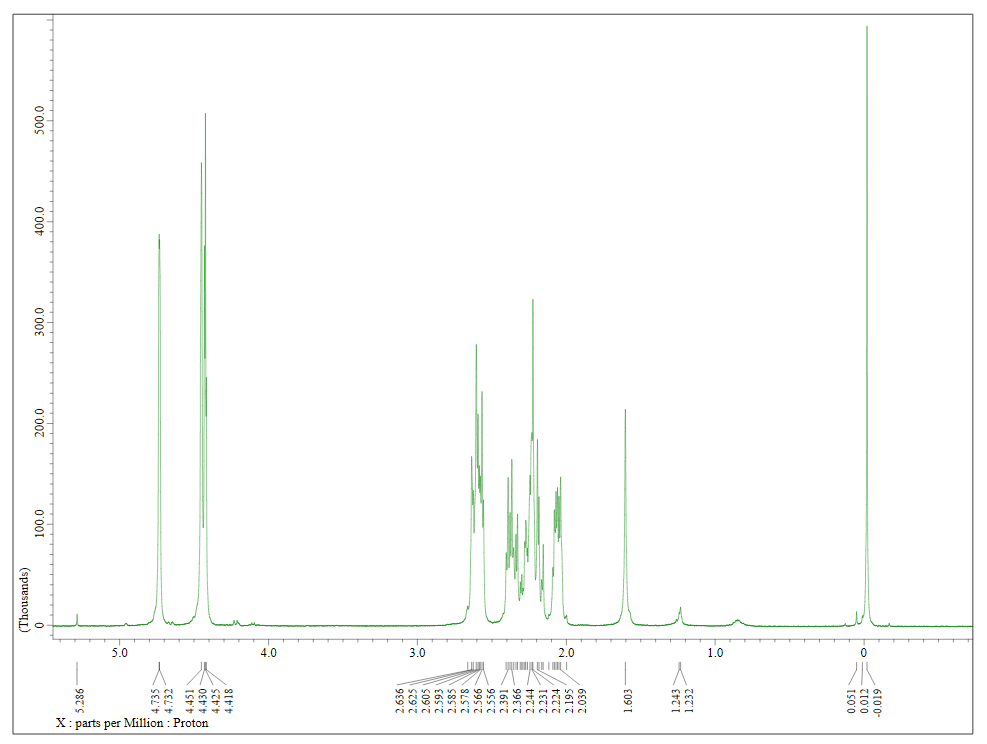


**Figure S5.** 13C NMR of **3b**


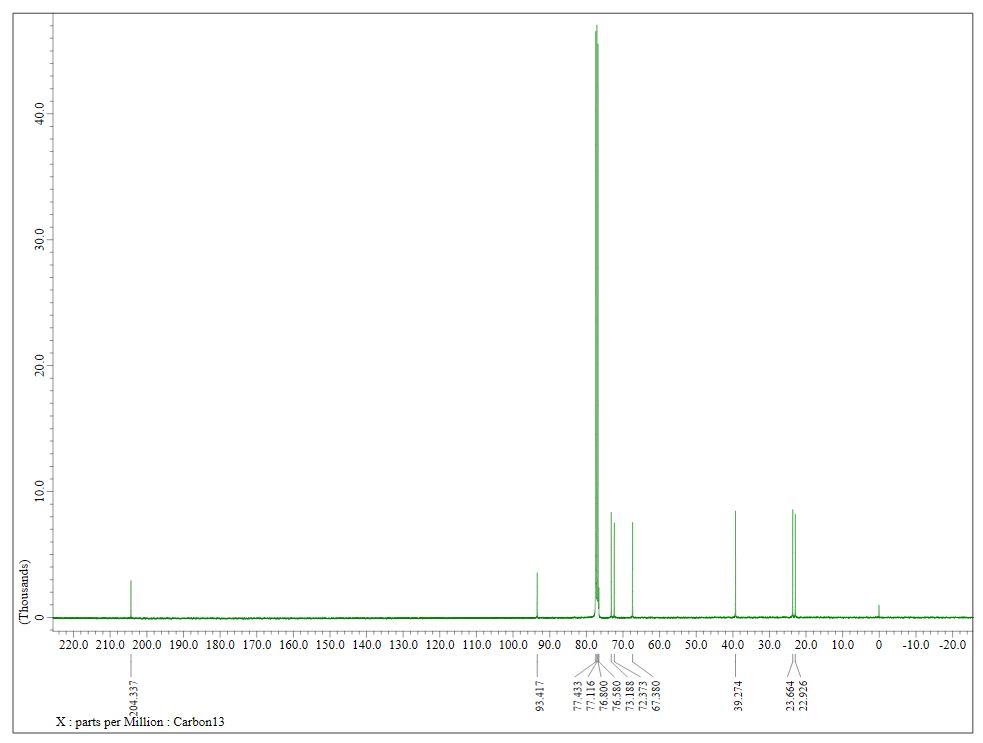


**Figure S6.** IR spectrum of **3b**


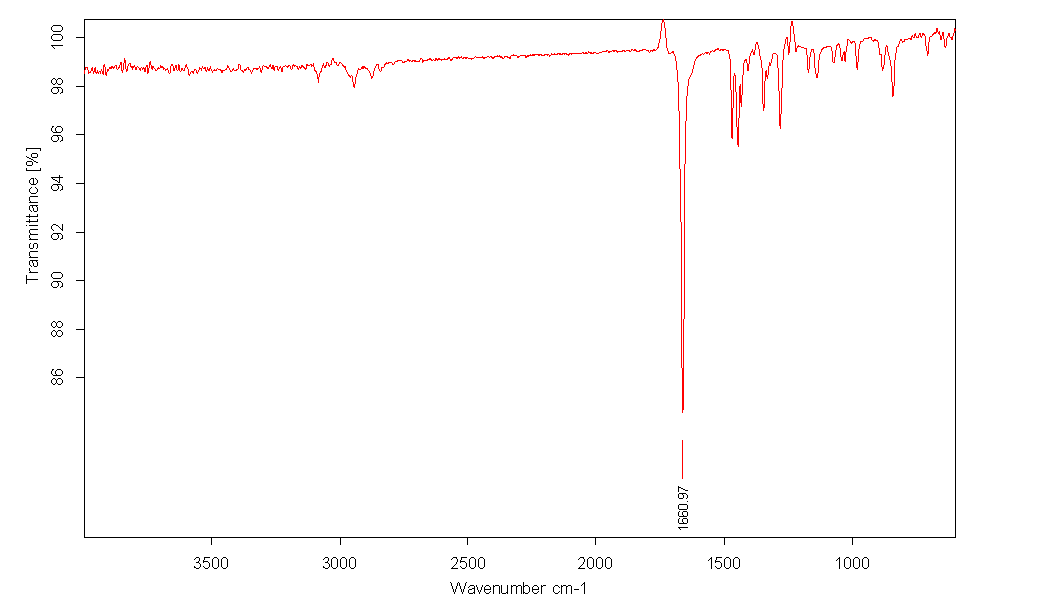


**Figure S7.** 1H NMR of **3b’**


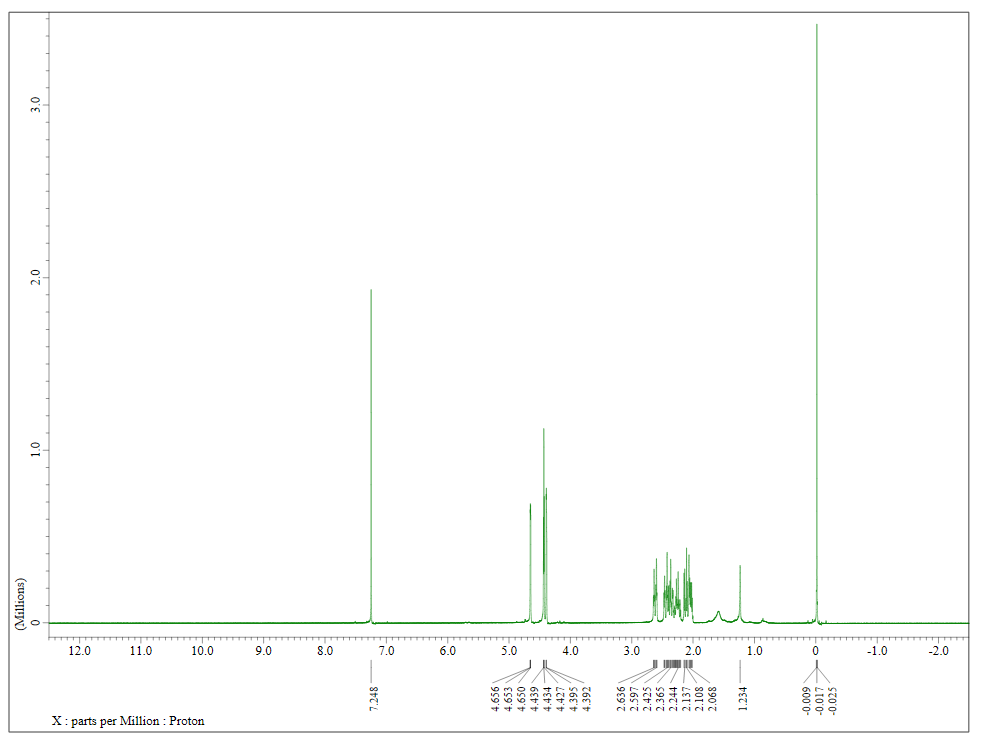


**Figure S8.** 13C NMR of **3b’**


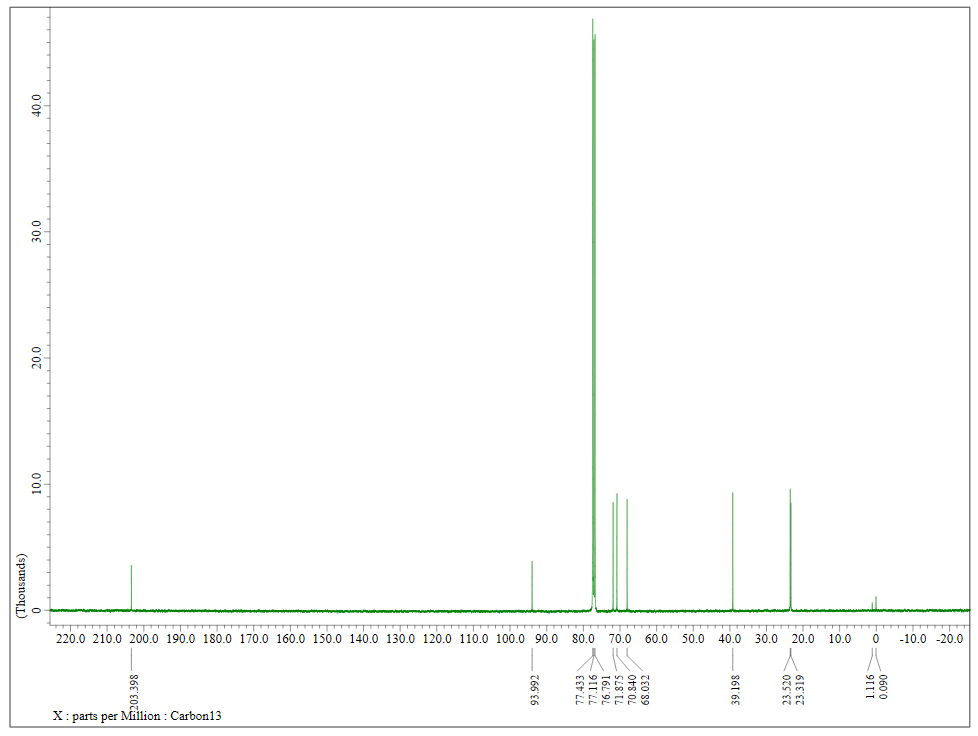


**Figure S9**. IR spectrum of **3b’**


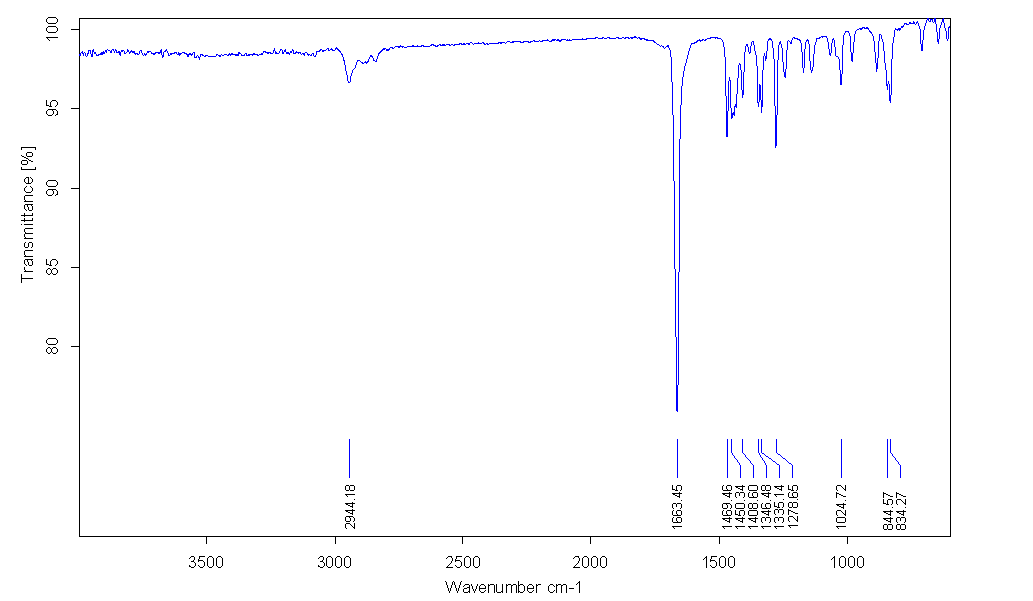


**Figure S10.** 1H NMR of **4a**


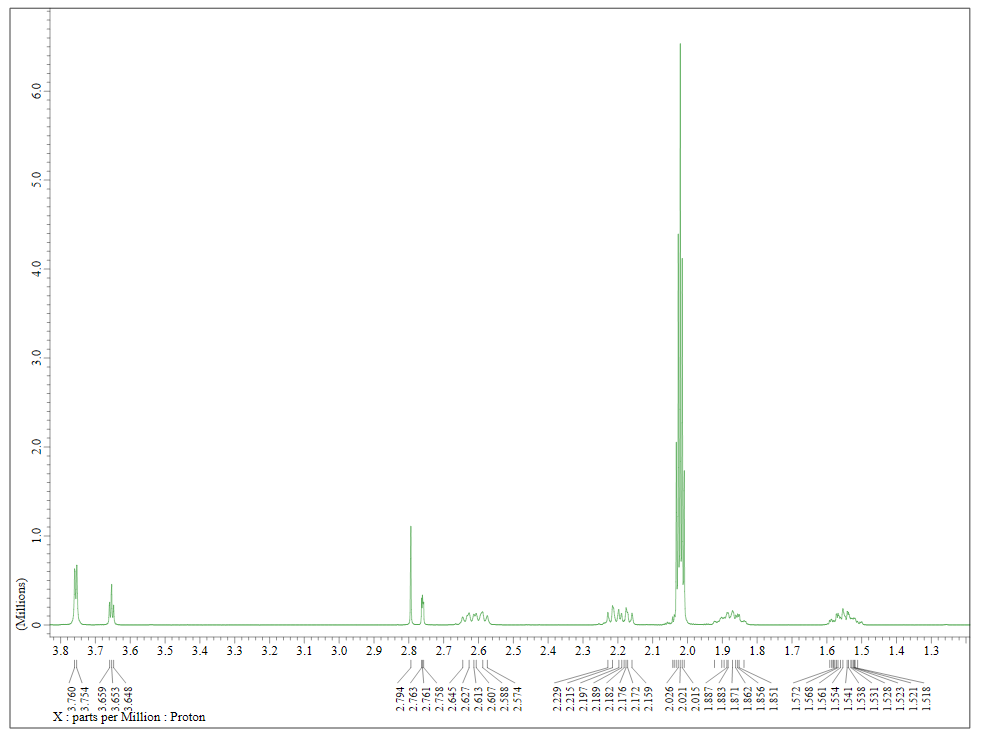


**Figure S11.** 13C NMR of **4a**


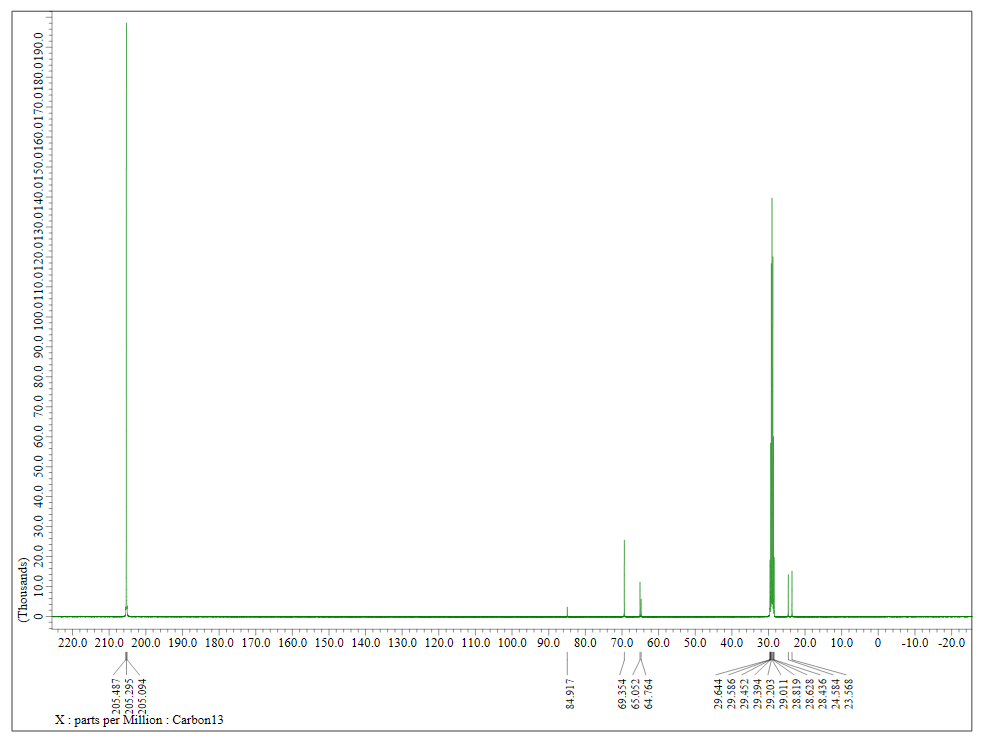


**Figure S12.** 1H NMR of **4b**


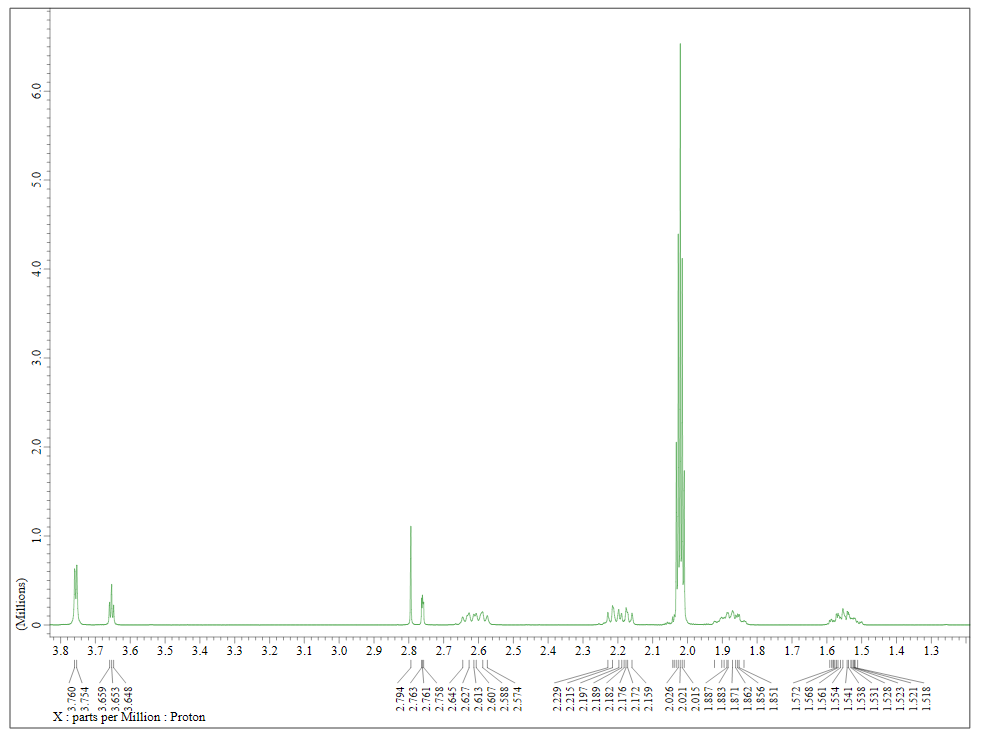


**Figure S13.** 13C NMR of **4b**


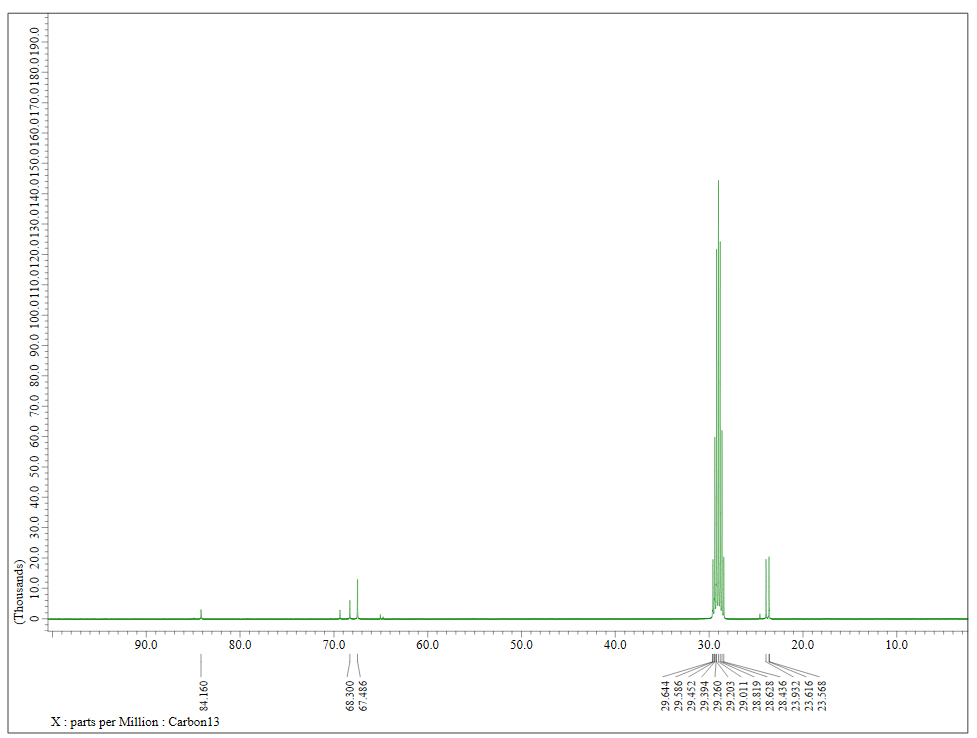


**Figure S14**. Packing diagram of **3b** along *b* axis


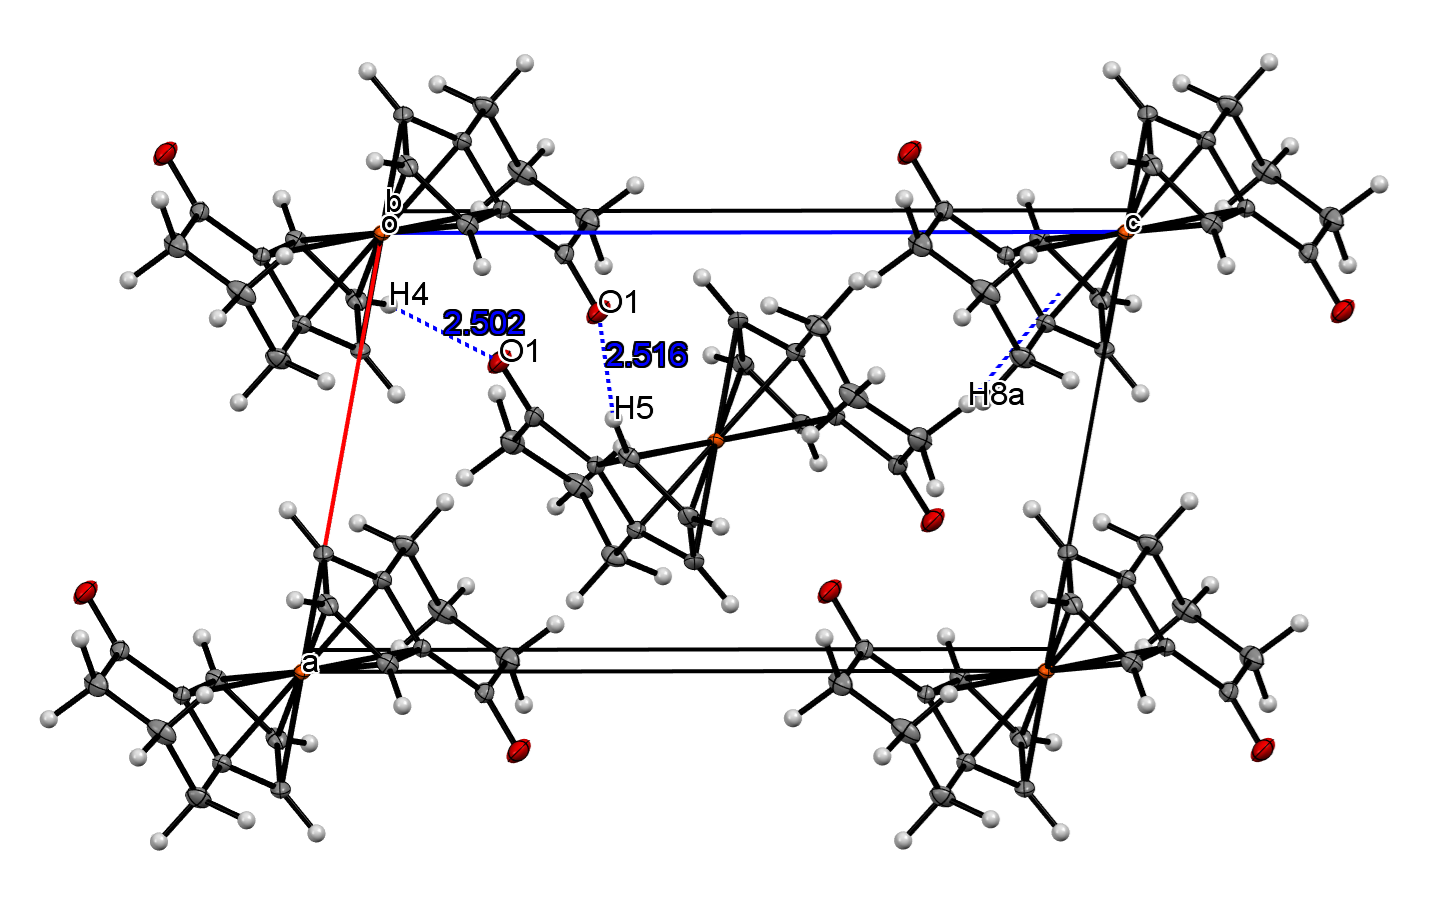


**Figure S15.** Packing diagram of **4a** along *a* axis.


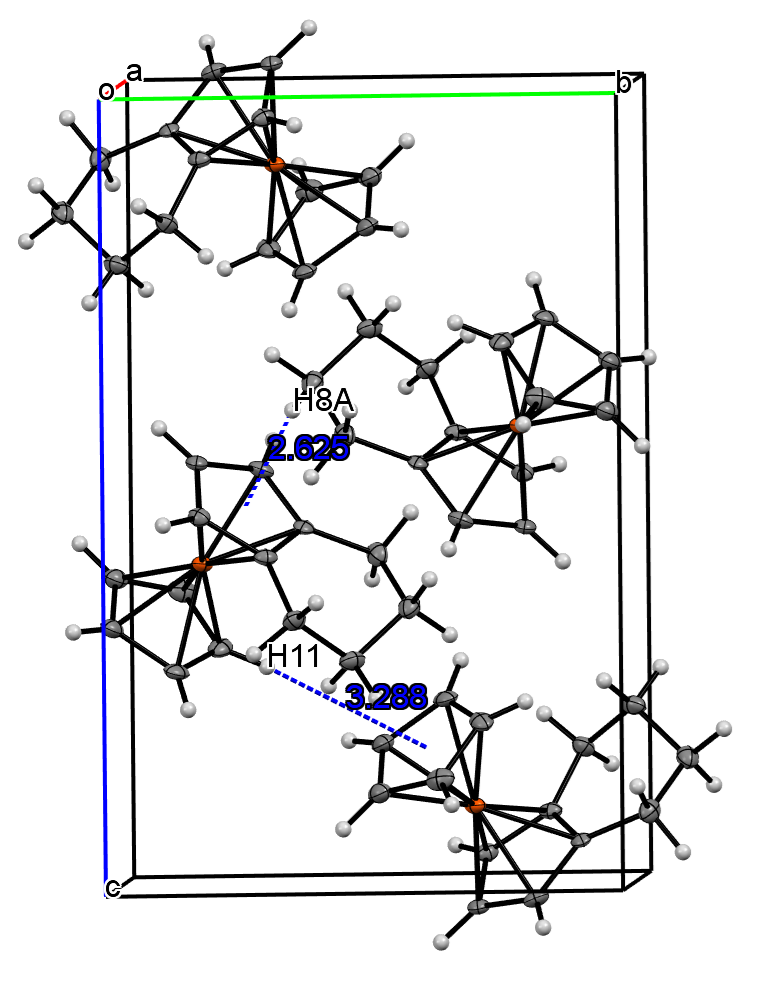

Supplement: Supplementary file 1 [file supplementary]
